# Supplementary material
Source: HighWire-hosted journal article supplement (https://adc.bmj.com/content/105/4/319)

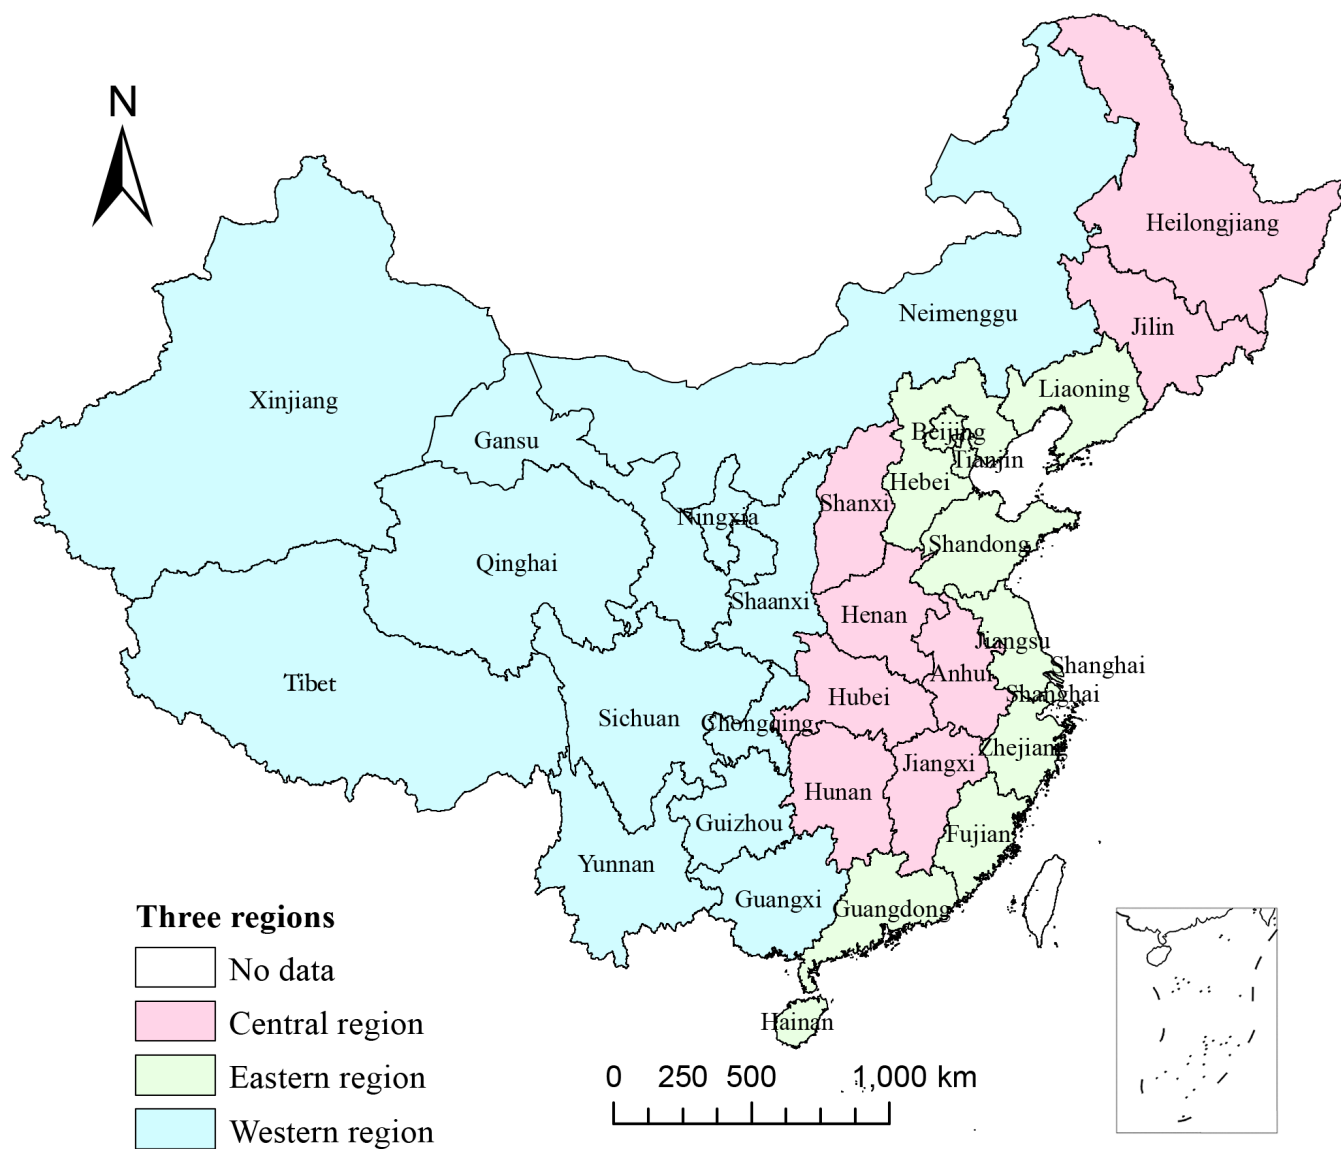

Supplement: inline-supplementary-material-1 [file inline-supplementary-material-1.pdf]
